# Supplementary material for: Streptococcus pneumoniae as a Cause of Community-Acquired Pneumonia in Indian Adolescents and Adults: A Systematic Review and Meta-Analysis
Source: PubMed Central journal article supplement (PMC6669839; doi:10.1177/1179548419862790), 2019-07-31
Supplement: Supplemental.pdf [file Supplemental.pdf]

## Supplementary Tables

**Table 1: Details of Risk of Bias Analysis**

| <b>Criteria</b>             |                                                                                              |          |          |          |          |          |          |          |          |           |
|-----------------------------|----------------------------------------------------------------------------------------------|----------|----------|----------|----------|----------|----------|----------|----------|-----------|
|                             | 1, Was the sample representative of the target population?                                   |          |          |          |          |          |          |          |          |           |
|                             | 2, Were study participants recruited in an appropriate way?                                  |          |          |          |          |          |          |          |          |           |
|                             | 3, Was the sample size adequate?                                                             |          |          |          |          |          |          |          |          |           |
|                             | 4, Were the study subjects and the setting described in detail?                              |          |          |          |          |          |          |          |          |           |
|                             | 5, Was the data analysis conducted with sufficient coverage of the identified sample?        |          |          |          |          |          |          |          |          |           |
|                             | 6, Were objective, standard criteria used for the measurement of the condition?              |          |          |          |          |          |          |          |          |           |
|                             | 7, Was the condition measured reliably?                                                      |          |          |          |          |          |          |          |          |           |
|                             | 8, Was there appropriate statistical analysis?                                               |          |          |          |          |          |          |          |          |           |
|                             | 9, Are all important confounding factors/subgroups/differences identified and accounted for? |          |          |          |          |          |          |          |          |           |
|                             | 10, Were subpopulations identified using objective criteria?                                 |          |          |          |          |          |          |          |          |           |
| <b>Publication</b>          | <b>1</b>                                                                                     | <b>2</b> | <b>3</b> | <b>4</b> | <b>5</b> | <b>6</b> | <b>7</b> | <b>8</b> | <b>9</b> | <b>10</b> |
| Acharya et al., 2014        | yes                                                                                          | unclear  | yes      | yes      | yes      | yes      | yes      | yes      | yes      | NA        |
| Anbumani et al., 2010       | unclear                                                                                      | unclear  | no       | yes      | NA       | yes      | yes      | NA       | no       | NA        |
| Angrup, et al., 2016        | yes                                                                                          | unclear  | no       | yes      | yes      | yes      | yes      | yes      | yes      | NA        |
| Bansal, et al., 2004        | yes                                                                                          | no       | no       | no       | yes      | yes      | yes      | yes      | yes      | NA        |
| Dey, et al., 2000           | yes                                                                                          | unclear  | no       | yes      | yes      | yes      | yes      | yes      | yes      | NA        |
| Dey, et al., 1997           | yes                                                                                          | unclear  | no       | yes      | yes      | yes      | yes      | yes      | yes      | yes       |
| Dharmadhikari, et al., 2013 | yes                                                                                          | unclear  | no       | no       | unclear  | yes      | yes      | yes      | no       | NA        |
| Dorairaj, et al., 2015      | yes                                                                                          | unclear  | no       | yes      | yes      | no       | yes      | no       | no       | NA        |
| Jain, et al., 2014          | yes                                                                                          | unclear  | no       | yes      | yes      | no       | yes      | yes      | no       | yes       |
| Kejriwal, et al., 2015      | yes                                                                                          | unclear  | no       | yes      | yes      | no       | yes      | no       | no       | NA        |
| Khadanga, et al., 2014      | yes                                                                                          | unclear  | no       | no       | yes      | yes      | yes      | no       | no       | NA        |
| Menon, et al., 2013         | yes                                                                                          | unclear  | no       | yes      | yes      | no       | yes      | NA       | no       | NA        |
| Mythri, et al., 2013        | yes                                                                                          | unclear  | no       | yes      | yes      | yes      | yes      | yes      | no       | NA        |
| Ravindranath, et al., 2016  | yes                                                                                          | unclear  | no       | yes      | yes      | no       | yes      | no       | no       | yes       |
| Shah, et al., 2010          | yes                                                                                          | unclear  | no       | yes      | no       | no       | yes      | no       | yes      | NA        |
| Shrikhande, et al., 2015    | yes                                                                                          | unclear  | no       | yes      | no       | no       | yes      | no       | no       | NA        |
| Sreekanth and Reddy, 2015   | yes                                                                                          | unclear  | no       | yes      | no       | no       | yes      | yes      | no       | yes       |

Table 2: Etiology Data of Studies for All Organisms

| Etiological Agent (EA) | No. of subjects with EA | Total No. of subjects with confirmed culture report | Total No. of subjects with CAP | Percentage of Occurrences  | Reference First Author (Year)      |
|------------------------|-------------------------|-----------------------------------------------------|--------------------------------|----------------------------|------------------------------------|
| <i>S. pneumoniae</i>   | 19                      | 65                                                  | 104                            | 18.3%                      | Dharmadhikari <i>et al.</i> , 2013 |
|                        | 10                      | 38                                                  | 100                            | 10.0%                      | Mythri <i>et al.</i> , 2013        |
|                        | 10                      | 29                                                  | 50                             | 20.0%                      | Sreekanth and Reddy, 2015          |
|                        | 19                      | 53                                                  | 70                             | 27.1%                      | Bansal <i>et al.</i> , 2003        |
|                        | 6                       | 11                                                  | 72                             | 8.3%                       | Dey <i>et al.</i> , 1997           |
|                        | 68                      | 149                                                 | 464                            | 14.7%                      | Khadanga <i>et al.</i> , 2014      |
|                        | 1                       | 29                                                  | 100                            | 1.0%                       | Shah <i>et al.</i> , 2010          |
|                        | 20                      | 55                                                  | 120                            | 16.7%                      | Jain <i>et al.</i> , 2014          |
|                        | 34                      | 60                                                  | 60                             | 56.7%                      | Kejriwal <i>et al.</i> , 2015      |
|                        | 11                      | 26                                                  | 50                             | 22.0%                      | Shrikhande <i>et al.</i> , 2015    |
|                        | 12                      | 39                                                  | 100                            | 12.0%                      | Acharya <i>et al.</i> , 2014       |
| 47                     | 145                     | 145                                                 | 32.4%                          | Menon <i>et al.</i> , 2013 |                                    |
| <b>Total</b>           | <b>257</b>              | <b>699</b>                                          | <b>1435</b>                    | <b>Range= 1.0–56.7%</b>    | <b>19.0%</b>                       |
| <i>K. pneumoniae</i>   | 17                      | 65                                                  | 104                            | 16.34%                     | Dharmadhikari <i>et al.</i> , 2013 |
|                        | 21                      | 38                                                  | 100                            | 21.0%                      | Mythri <i>et al.</i> , 2013        |
|                        | 12                      | 29                                                  | 50                             | 24.0%                      | Sreekanth and Reddy, 2015          |
|                        | 12                      | 53                                                  | 70                             | 17.14%                     | Bansal <i>et al.</i> , 2003        |
|                        | 3                       | 11                                                  | 72                             | 4.16%                      | Dey <i>et al.</i> , 1997           |
|                        | 29                      | 149                                                 | 464                            | 6.25%                      | Khadanga <i>et al.</i> , 2014      |
|                        | 3                       | 29                                                  | 100                            | 3.0%                       | Shah <i>et al.</i> , 2010          |
| 16                     | 55                      | 120                                                 | 13.33%                         | Jain <i>et al.</i> ,       |                                    |

| Etiological Agent (EA) | No. of subjects with EA | Total No. of subjects with confirmed culture report | Total No. of subjects with CAP | Percentage of Occurrences | Reference First Author (Year)      |
|------------------------|-------------------------|-----------------------------------------------------|--------------------------------|---------------------------|------------------------------------|
|                        |                         |                                                     |                                |                           | 2014                               |
|                        | 1                       | 60                                                  | 60                             | 1.6%                      | Kejriwal <i>et al.</i> , 2015      |
|                        | 3                       | 26                                                  | 50                             | 6.0%                      | Shrikhande <i>et al.</i> , 2015    |
|                        | 5                       | 39                                                  | 100                            | 5.0%                      | Acharya <i>et al.</i> , 2014       |
|                        | 29                      | 145                                                 | 145                            | 20.0%                     | Menon <i>et al.</i> , 2013         |
| <b>Total</b>           | <b>151</b>              | <b>699</b>                                          | <b>1435</b>                    | <b>Range= 1.6–24.0%</b>   | <b>10.52%</b>                      |
| <b>M. pneumoniae</b>   | 8                       | 53                                                  | 70                             | 1.14%                     | Bansal <i>et al.</i> , 2003        |
|                        | 22                      | 62                                                  | 62                             | 35.48%                    | Dey <i>et al.</i> , 2000           |
|                        | 7                       | 13                                                  | 107                            | 6.54%                     | Dorairaj <i>et al.</i> , 2015      |
| <b>Total</b>           | <b>37</b>               | <b>128</b>                                          | <b>239</b>                     | <b>Range=1.14–35.48%</b>  | <b>15.48%</b>                      |
| <b>P. aeruginosa</b>   | 8                       | 65                                                  | 104                            | 7.69%                     | Dharmadhikari <i>et al.</i> , 2013 |
|                        | 4                       | 38                                                  | 100                            | 4.0%                      | Mythri <i>et al.</i> , 2013        |
|                        | 2                       | 29                                                  | 50                             | 4.0%                      | Sreekanth and Reddy, 2015          |
|                        | 2                       | 53                                                  | 70                             | 2.85%                     | Bansal <i>et al.</i> , 2003        |
|                        | 1                       | 11                                                  | 72                             | 1.38%                     | Dey <i>et al.</i> , 1997           |
|                        | 31                      | 149                                                 | 464                            | 6.68%                     | Khadanga <i>et al.</i> , 2014      |
|                        | 10                      | 29                                                  | 100                            | 10.0%                     | Shah <i>et al.</i> , 2010          |
|                        | 1                       | 55                                                  | 120                            | 0.83%                     | Jain <i>et al.</i> , 2014          |
|                        | 7                       | 60                                                  | 60                             | 11.6%                     | Kejriwal <i>et al.</i> , 2015      |
|                        | 4                       | 26                                                  | 50                             | 8.0%                      | Shrikhande <i>et al.</i> , 2015    |
|                        | 6                       | 39                                                  | 100                            | 6.0%                      | Acharya <i>et al.</i> , 2014       |
|                        | 13                      | 145                                                 | 145                            | 8.96%                     | Menon <i>et al.</i> , 2013         |
| <b>Total</b>           | <b>89</b>               | <b>699</b>                                          | <b>1435</b>                    | <b>Range= 0.83–11.6%</b>  | <b>6.20%</b>                       |
| <b>S. aureus</b>       | 13                      | 65                                                  | 104                            | 12.5%                     | Dharmadhikari <i>et al.</i> , 2013 |

| Etiological Agent (EA) | No. of subjects with EA | Total No. of subjects with confirmed culture report | Total No. of subjects with CAP | Percentage of Occurrences | Reference First Author (Year)      |
|------------------------|-------------------------|-----------------------------------------------------|--------------------------------|---------------------------|------------------------------------|
|                        | 1                       | 38                                                  | 100                            | 1.0%                      | Mythri <i>et al.</i> , 2013        |
|                        | 1                       | 29                                                  | 50                             | 2.0%                      | Sreekanth and Reddy, 2015          |
|                        | 9                       | 53                                                  | 70                             | 12.85%                    | Bansal <i>et al.</i> , 2003        |
|                        | 12                      | 149                                                 | 464                            | 2.58%                     | Khadanga <i>et al.</i> , 2014      |
|                        | 7                       | 29                                                  | 100                            | 7.0%                      | Shah <i>et al.</i> , 2010          |
|                        | 15                      | 27                                                  | 150                            | 10.0%                     | Ravidranath and Raju, 2016         |
|                        | 11                      | 55                                                  | 120                            | 9.16%                     | Jain <i>et al.</i> , 2014          |
|                        | 2                       | 60                                                  | 60                             | 3.33%                     | Kejriwal <i>et al.</i> , 2015      |
|                        | 5                       | 26                                                  | 50                             | 10.0%                     | Shrikhande <i>et al.</i> , 2015    |
|                        | 3                       | 39                                                  | 100                            | 3.0%                      | Acharya <i>et al.</i> , 2014       |
| <b>Total</b>           | <b>79</b>               | <b>570</b>                                          | <b>1468</b>                    | <b>Range= 1.0–12.8%</b>   | <b>5.38%</b>                       |
| <i>Acinetobacter</i>   | 3                       | 65                                                  | 104                            | 2.88%                     | Dharmadhikari <i>et al.</i> , 2013 |
|                        | 2                       | 29                                                  | 50                             | 4.0%                      | Sreekanth and Reddy, 2015          |
|                        | 1                       | 53                                                  | 70                             | 1.4%                      | Bansal <i>et al.</i> , 2003        |
|                        | 1                       | 29                                                  | 100                            | 1.0%                      | Shah <i>et al.</i> , 2010          |
|                        | 1                       | 55                                                  | 120                            | 0.83%                     | Jain <i>et al.</i> , 2014          |
|                        | 3                       | 60                                                  | 60                             | 5.0%                      | Kejriwal <i>et al.</i> , 2015      |
|                        | 3                       | 39                                                  | 100                            | 3.0%                      | Acharya <i>et al.</i> , 2014       |
| <b>Total</b>           | <b>14</b>               | <b>330</b>                                          | <b>604</b>                     | <b>Range= 0.83–5.0%</b>   | <b>2.31%</b>                       |
| <i>Enterobacter</i>    | 2                       | 29                                                  | 50                             | 4.0%                      | Sreekanth and Reddy, 2015          |
|                        | 1                       | 53                                                  | 70                             | 1.42%                     | Bansal <i>et al.</i> , 2003        |
|                        | 1                       | 55                                                  | 120                            | 0.83%                     | Jain <i>et al.</i> , 2014          |

| Etiological Agent (EA)       | No. of subjects with EA | Total No. of subjects with confirmed culture report | Total No. of subjects with CAP | Percentage of Occurrences  | Reference First Author (Year)      |
|------------------------------|-------------------------|-----------------------------------------------------|--------------------------------|----------------------------|------------------------------------|
|                              | 1                       | 39                                                  | 100                            | 1.0%                       | Acharya <i>et al.</i> , 2014       |
| <b>Total</b>                 | <b>5</b>                | <b>176</b>                                          | <b>340</b>                     | <b>Range= 0.83–4.0%</b>    | <b>1.47%</b>                       |
| <b><i>E. coli</i></b>        | 4                       | 65                                                  | 104                            | 3.84%                      | Dharmadhikari <i>et al.</i> , 2013 |
|                              | 1                       | 38                                                  | 100                            | 1.0%                       | Mythri <i>et al.</i> , 2013        |
|                              | 2                       | 29                                                  | 50                             | 4.0%                       | Sreekanth and Reddy, 2015          |
|                              | 6                       | 53                                                  | 70                             | 8.57%                      | Bansal <i>et al.</i> , 2003        |
|                              | 6                       | 29                                                  | 100                            | 6.0%                       | Shah <i>et al.</i> , 2010          |
|                              | 1                       | 55                                                  | 120                            | 0.83%                      | Jain <i>et al.</i> , 2014          |
|                              | 3                       | 60                                                  | 60                             | 5.0%                       | Kejriwal <i>et al.</i> , 2015      |
|                              | 3                       | 26                                                  | 50                             | 6.0%                       | Shrikhande <i>et al.</i> , 2015    |
|                              | 3                       | 39                                                  | 100                            | 3.0%                       | Acharya <i>et al.</i> , 2014       |
| 9                            | 145                     | 145                                                 | 6.20%                          | Menon <i>et al.</i> , 2013 |                                    |
| <b>Total</b>                 | <b>38</b>               | <b>539</b>                                          | <b>899</b>                     | <b>Range= 0.83–8.57%</b>   | <b>4.22%</b>                       |
| <b><i>L. pneumophila</i></b> | 12                      | 470                                                 | 470                            | 2.5%                       | Anbumani <i>et al.</i> , 2010      |
|                              | 32                      | 134                                                 | 134                            | 23.88%                     | Angrup <i>et al.</i> , 2016        |
| <b>Total</b>                 | <b>44</b>               | <b>604</b>                                          | <b>604</b>                     | <b>Range= 2.5–23.8%</b>    | <b>7.28%</b>                       |
